# Supplementary material for: Characteristics and Risk Factors for Intensive Care Unit Cardiac Arrest in Critically Ill Patients with COVID-19—A Retrospective Study
Source: MDPI journal article supplement (doi:10.3390/jcm10102195), 2021-05-19
Supplement: s1 [file s1]

**Supplementary Table S1** – Pre-existing comorbidities of patients stratified according to ICU cardiac arrest (ICU-CA) and no ICU cardiac arrest (No ICU-CA)

| <i>Parameters</i>                               | <i>All patients<br/>(n=183)</i> | <i>ICU-CA<br/>(n=33)</i> | <i>No ICU-CA<br/>(n=150)</i> | <i>p-value</i> |
|-------------------------------------------------|---------------------------------|--------------------------|------------------------------|----------------|
| <b>AIDS</b> <i>n (%)</i>                        | 0 (0)                           | 0 (0)                    | 0 (0)                        | 1              |
| <b>Cerebral arterial disease</b> <i>n (%)</i>   | 32 (17)                         | 4 (12)                   | 28 (19)                      | 0.370          |
| <b>Chronic lung disease</b> <i>n (%)</i>        | 27 (15)                         | 5 (15)                   | 22 (15)                      | 0.943          |
| <b>Chronic kidney disease</b> <i>n (%)</i>      | 28 (15)                         | 3 (9)                    | 25 (17)                      | 0.274          |
| <b>Congestive heart disease</b> <i>n (%)</i>    | 26 (14)                         | 5 (15)                   | 21 (14)                      | 0.864          |
| <b>Connective tissue disease</b> <i>n (%)</i>   | 12 (7)                          | 1 (3)                    | 11 (7)                       | 0.366          |
| <b>Coronary heart disease</b> <i>n (%)</i>      | 34 (19)                         | 7 (21)                   | 27 (18)                      | 0.534          |
| <b>Dementia</b> <i>n (%)</i>                    | 3 (2)                           | 0 (0)                    | 3 (2)                        | 0.951          |
| <b>Diabetes mellitus</b> <i>n (%)</i>           | 60 (33)                         | 12 (36)                  | 48 (32)                      | 0.259          |
| <b>Liver cirrhosis</b> <i>n (%)</i>             | 4 (2)                           | 0 (0)                    | 4 (3)                        | 0.413          |
| <b>Peripheral arterial disease</b> <i>n (%)</i> | 9 (5)                           | 3 (9)                    | 6 (4)                        | 0.221          |
| <b>Malignancy (Tumour)</b> <i>n (%)</i>         | 24 (13)                         | 5 (15)                   | 19 (13)                      | 0.808          |

*Abbreviations:* AIDS, acquired immune deficiency syndrome; n, number;

**Supplementary Table S2** – Detailed characteristics of respiratory support and ICU therapies in patients with ICU-CA stratified according favorable and unfavorable outcome

| <i>Parameters</i>                                        | <i>All patients<br/>(n=33)</i> | <i>ICU-CA<br/>favorable<br/>(n=10)</i> | <i>ICU-CA non-<br/>favorable<br/>(n=23)</i> | <i>p-value</i> |
|----------------------------------------------------------|--------------------------------|----------------------------------------|---------------------------------------------|----------------|
| <b><u>Characteristics of respiratory failure</u></b>     |                                |                                        |                                             |                |
| <b>Respiratory support (before CA)</b>                   |                                |                                        |                                             |                |
| - Non-invasive ventilation <i>n</i> (%)                  | 9 (27)                         | 4 (40)                                 | 5 (22)                                      | 0.279          |
| - Mechanical ventilation <i>n</i> (%)                    | 23 (70)                        | 6 (60)                                 | 17 (74)                                     | 0.424          |
| - ECMO in place <i>n</i> (%)                             | 8 (24)                         | 3 (30)                                 | 5 (22)                                      | 0.611          |
| <b>P/F Ratio</b>                                         |                                |                                        |                                             |                |
| - Worst P/F <i>median</i> (IQR)                          | 56 (46 – 83)                   | 58 (55 – 107)                          | 85 (58 – 116)                               | 0.703          |
| - P/F before CA <i>median</i> (IQR)                      | 114 (80 – 154)                 | 167 (78 – 298)                         | 111 (81 – 137)                              | 0.251          |
| - P/F after CA <i>median</i> (IQR)                       | 114 (80 – 154)                 | 93 (65 – 174)                          | 97 (67 – 140)                               | 0.685          |
| - P/F 24h after CA <i>median</i> (IQR)                   | 108 (82 – 206)                 | 202 (140 – 258)                        | 92 (80 – 119)                               | 0.019          |
| <b>ARDS Management</b>                                   |                                |                                        |                                             |                |
| - Prone Positioning <i>n</i> (%)                         | 17 (52)                        | 5 (50)                                 | 12 (52)                                     | 0.909          |
| - Neuromuscular Blockage <i>n</i> (%)                    | 9 (27)                         | 3 (30)                                 | 6 (26)                                      | 0.817          |
| - Corticosteroids <i>n</i> (%)                           | 23 (70)                        | 6 (60)                                 | 17 (74)                                     | 0.424          |
| - Inhaled Vasodilators <i>n</i> (%)                      | 15 (45)                        | 4 (30)                                 | 11 (48)                                     | 0.678          |
| <b>Extracorporeal membrane oxygenation</b>               |                                |                                        |                                             |                |
| - ECMO overall <i>n</i> (%)                              | 17 (52)                        | 6 (60)                                 | 11 (48)                                     | 0.520          |
| - ECMO before CA <i>n</i> (%)                            | 10 (30)                        | 5 (50)                                 | 5 (22)                                      | 0.104          |
| - E-CPR <i>n</i> (%)                                     | 1 (3)                          | 0 (0)                                  | 1 (4)                                       | 0.503          |
| - Peri-arrest ECMO <i>n</i> (%)                          | 5 (15)                         | 1 (10)                                 | 4 (17)                                      | 0.586          |
| <b>ICU Intervention - in place before CA</b>             |                                |                                        |                                             |                |
| Mechanical ventilation <i>n</i> (%)                      | 23 (70)                        | 6 (60)                                 | 17 (74)                                     | 0.424          |
| Non-invasive mechanical ventilation/HFNC<br><i>n</i> (%) | 9 (27)<br>8 (24)               | 4 (40)<br>3 (30)                       | 5 (22)<br>5 (22)                            | 0.279<br>0.611 |
| Renal replacement therapy <i>n</i> (%)                   | 14 (42)                        | 2 (20)                                 | 12 (52)                                     | 0.341          |
| Renal replacement therapy – new after ICU-<br>CA         | 27 (82)                        | 5 (50)                                 | 22 (96)                                     | 0.002          |
| Vasopressor therapy <i>n</i> (%)                         |                                |                                        |                                             |                |

*Abbreviations:* CA, cardiac arrest; cm, centimeter; E-CPR, extracorporeal cardiopulmonary resuscitation; ECMO, extracorporeal membrane oxygenation; ICU, intensive care unit; IQR, inter quartile range; n, number; pts., points; MAP, mean arterial pressure;

**Supplementary Table S3** – Hemodynamic characteristics of in patients with ICU-CA stratified according favorable and unfavorable outcome

| <i>Parameters</i>                                   | <i>All patients<br/>(n=33)</i> | <i>ICU-CA favorable<br/>(n=10)</i> | <i>ICU-CA non-<br/>favorable<br/>(n=23)</i> | <i>p-value</i> |
|-----------------------------------------------------|--------------------------------|------------------------------------|---------------------------------------------|----------------|
| <b><u>Hemodynamic characteristics</u></b>           |                                |                                    |                                             |                |
| <b><i>Hemodynamic parameters - before CA</i></b>    |                                |                                    |                                             |                |
| Heart rate <i>median (IQR)</i>                      | 100 (85 – 118)                 | 107 (91 – 113)                     | 100 (85 – 120)                              | 0.540          |
| Mean arterial pressure <i>median (IQR)</i>          | 66 (58 – 77)                   | 77 (61 – 84)                       | 65 (58 – 75)                                | 0.171          |
| Vasopressor therapy <i>n (%)</i>                    | 27 (82)                        | 5 (50)                             | 22 (96)                                     | 0.002          |
| Norepinephrine dose* <i>median (IQR)</i>            | 0.397 (0.130 – 0.779)          | 0.117 (0.081 – 0.149)              | 0.535 (0.216 – 0.895)                       | 0.068          |
| <b><i>Hemodynamic parameters – post CA</i></b>      |                                |                                    |                                             |                |
| Heart Rate – after CA <i>median (IQR)</i>           | 123 (104 – 138)                | 116 (82 – 128)                     | 123 (114 – 142)                             | 0.150          |
| MAP – after CA <i>median (IQR)</i>                  | 73 (66 – 95)                   | 71 (69 – 85)                       | 73 (66 – 97)                                | 0.966          |
| Vasopressor therapy <i>n (%)</i>                    | 31 (94)                        | 8 (80)                             | 23 (100)                                    | 0.027          |
| Norepinephrine dose* <i>median (IQR)</i>            | 0.691 (0.168 – 1.253)          | 0.158 (0.120 – 0.255)              | 0.879 (0.329 – 1.558)                       | 0.005          |
| <b><i>Hemodynamic parameters – 24h after CA</i></b> |                                |                                    |                                             |                |
| Heart rate <i>median (IQR)</i>                      | 83 (75 – 111)                  | 77 (73 – 89)                       | 86 (75 – 113)                               | 0.541          |
| Mean arterial pressure <i>median (IQR)</i>          | 74 (67 – 85)                   | 74 (69 – 76)                       | 74 (66 – 86)                                | 0.890          |
| Vasopressor therapy <i>n (%)</i>                    | 24 (77)                        | 8 (80)                             | 16 (70)                                     | 0.063          |
| Norepinephrine dose* <i>median (IQR)</i>            | 0.175 (0.103 – 0.367)          | 0.070 (0.033 – 0.137)              | 0.259 (0.163 – 0.448)                       | 0.005          |

Abbreviations: CA, cardiac arrest; IQR, inter quartile range; n, number; MAP, mean arterial pressure; \* µg/kg/min

**Supplementary Table S4** – Logistic regression model for factors associated with occurrence ICU-CA

|                            | <b>Covariables</b>                    | <b>OR (95% CI)</b>      | <b>p value</b> |
|----------------------------|---------------------------------------|-------------------------|----------------|
| <b><u>Step 1:</u></b>      | Age (years)                           | 1.004 (0.969 to 1.040)  | 0.819          |
|                            | SAPS II admission (points)            | 1.022 (0.981 to 1.065)  | 0.302          |
|                            | Vasopressor (yes vs no)               | 2.535 (0.223 to 28.827) | 0.453          |
|                            | Renal replacement therapy (yes vs no) | 1.541 (0.514 to 4.619)  | 0.440          |
|                            | Septic shock (yes vs no)              | 0.822 (0.264 to 2.558)  | 0.736          |
|                            | ARDS (yes vs no)                      | 2.590 (0.543 to 12.352) | 0.233          |
|                            | SOFA admission (points)               | 1.018 (0.918 to 1.128)  | 0.739          |
| <b><u>Step 2:</u></b>      | SAPS II admission (points)            | 1.024 (0.985 to 1.064)  | 0.226          |
|                            | Vasopressor (yes vs no)               | 2.606 (0.232 to 29.232) | 0.438          |
|                            | Renal replacement therapy (yes vs no) | 1.542 (0.514 to 4.625)  | 0.439          |
|                            | Septic shock (yes vs no)              | 0.812 (0.262 to 2.513)  | 0.718          |
|                            | ARDS (yes vs no)                      | 2.573 (0.540 to 12.263) | 0.235          |
|                            | SOFA admission (points)               | 1.014 (0.920 to 1.118)  | 0.781          |
| <b><u>Step 3:</u></b>      | SAPS II admission (points)            | 1.026 (0.990 to 1.063)  | 0.164          |
|                            | Vasopressor (yes vs no)               | 2.722 (0.248 to 29.904) | 0.413          |
|                            | Renal replacement therapy (yes vs no) | 1.528 (0.510 to 4.576)  | 0.449          |
|                            | Septic shock (yes vs no)              | 0.828 (0.270 to 2.538)  | 0.741          |
|                            | ARDS (yes vs no)                      | 2.638 (0.561 to 12.417) | 0.220          |
| <b><u>Step 4:</u></b>      | SAPS II admission (points)            | 1.025 (0.989 to 1.061)  | 0.175          |
|                            | Vasopressor (yes vs no)               | 2.785 (0.255 to 30.418) | 0.401          |
|                            | Renal replacement therapy (yes vs no) | 1.380 (0.552 to 3.453)  | 0.491          |
|                            | ARDS (yes vs no)                      | 2.466 (0.552 to 11.019) | 0.237          |
| <b><u>Step 5:</u></b>      | SAPS II admission (points)            | 1.028 (0.994 to 1.063)  | 0.103          |
|                            | Vasopressor (yes vs no)               | 2.846 (0.259 to 31.337) | 0.393          |
|                            | ARDS (yes vs no)                      | 2.768 (0.638 to 12.006) | 0.174          |
| <b><u>Final Model:</u></b> | SAPS II admission (points)            | 1.031 (0.997 to 1.065)  | 0.077          |
|                            | ARDS (yes vs no)                      | 4.268 (1.211 to 15.036) | 0.024          |

**Abbreviations:** ARDS, Acute Respiratory Distress Syndrome; CI confidence interval; HR, multivariable adjusted hazard ratio; SAPS II, Simplified Acute Physiology Score; SOFA, Sequential Organ Failure Assessment;
